# Supplementary material for: Using Synthetic Remote Sensing Indicators to Monitor the Land Degradation in a Salinized Area
Source: MDPI journal article supplement (doi:10.3390/rs13152851), 2021-07-21
Supplement: s1 [file s1]

## Supplementary Materials for

# Using synthetic remote sensing indicators to monitor the land degradation in a salinized area

Tao Yu<sup>1,2</sup>, Guli-Jiapaer<sup>1,3\*</sup>, Anming Bao<sup>1,3</sup>, Guoxiong Zheng<sup>1,2</sup>, Liangliang Jiang<sup>4</sup>, Ye Yuan<sup>1,2,5</sup> and Xiaoran Huang<sup>1,2</sup>

<sup>1</sup> State Key Laboratory of Desert and Oasis Ecology, Xinjiang Institute of Ecology and Geography, Chinese Academy of Sciences, Urumqi 830011, China; [yutao171@mails.ucas.ac.cn](mailto:yutao171@mails.ucas.ac.cn) (T.Y.); [baoam@ms.xjb.ac.cn](mailto:baoam@ms.xjb.ac.cn) (A.B.); [zhengguoxiong17@mails.ucas.edu.cn](mailto:zhengguoxiong17@mails.ucas.edu.cn) (G.Z.); [yeyuan.rs@gmail.com](mailto:yeyuan.rs@gmail.com) (Y.Y.); [huangxiaoran14@mails.ucas.edu.cn](mailto:huangxiaoran14@mails.ucas.edu.cn) (X.H.)

<sup>2</sup> University of Chinese Academy of Sciences, Beijing 100049, China

<sup>3</sup> Research Center for Ecology and Environment of Central Asia, Chinese Academy of Sciences, Urumqi 830011, China

<sup>4</sup> School of Geography and Tourism, Chongqing Normal University, Chongqing 401331, China; [jiang@cqnu.edu.cn](mailto:jiang@cqnu.edu.cn) (L.J.)

<sup>5</sup> Sino-Belgian Joint Laboratory of Geo-information, Ghent 9000, Belgium

\* Correspondence: [glmr@ms.xjb.ac.cn](mailto:glmr@ms.xjb.ac.cn)

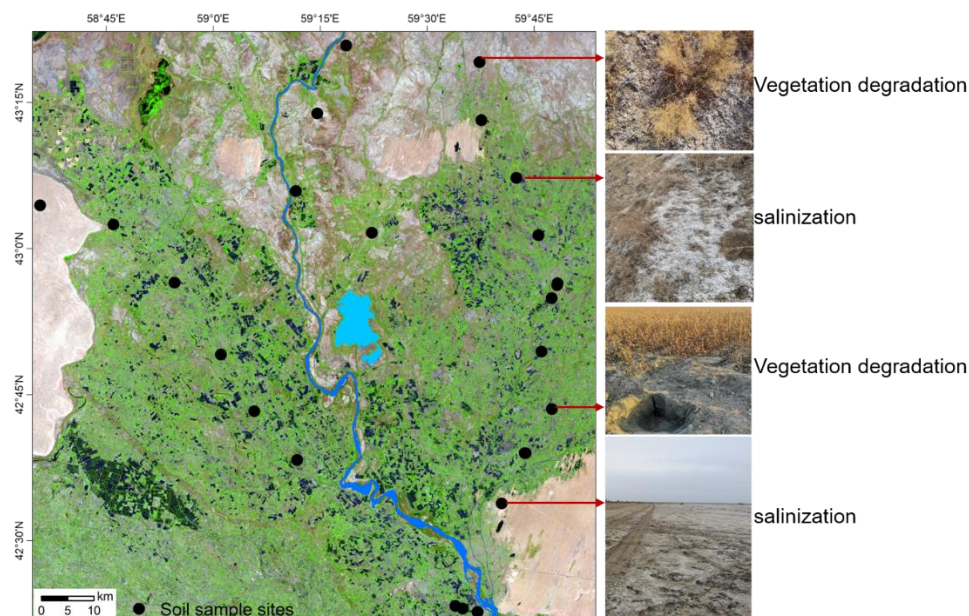

Figure S1. Soil sampling sites of the ADD.

**Table S1.** Field sampling data of soil salt

| <b>SDI</b> | <b>Soil salt content (mg/g)</b> | <b>Soil sample sites</b> |
|------------|---------------------------------|--------------------------|
| 0.58       | 125.65                          | c1                       |
| 0.53       | 120.31                          | N1                       |
| 0.33       | 98.38                           | N11                      |
| 0.38       | 94.35                           | N12                      |
| 0.33       | 84.00                           | N14                      |
| 0.51       | 102.00                          | N15                      |
| 0.36       | 92.31                           | N16                      |
| 0.26       | 77.48                           | N17                      |
| 0.26       | 60.88                           | N18                      |
| 0.21       | 53.45                           | N2                       |
| 0.21       | 39.90                           | N20                      |
| 0.18       | 35.85                           | N23                      |
| 0.17       | 34.45                           | N24                      |
| 0.16       | 28.50                           | N25                      |
| 0.15       | 23.95                           | N27                      |
| 0.13       | 21.83                           | N29                      |
| 0.12       | 10.65                           | N30                      |
| 0.22       | 18.60                           | N33                      |
| 0.22       | 35.89                           | N34                      |
| 0.16       | 15.60                           | N4                       |
| 0.11       | 2.00                            | N6                       |
| 0.16       | 1.90                            | N8                       |
| 0.11       | 1.50                            | N9                       |
| 0.11       | 0.88                            | N151                     |
| 0.10       | 0.75                            | N158                     |

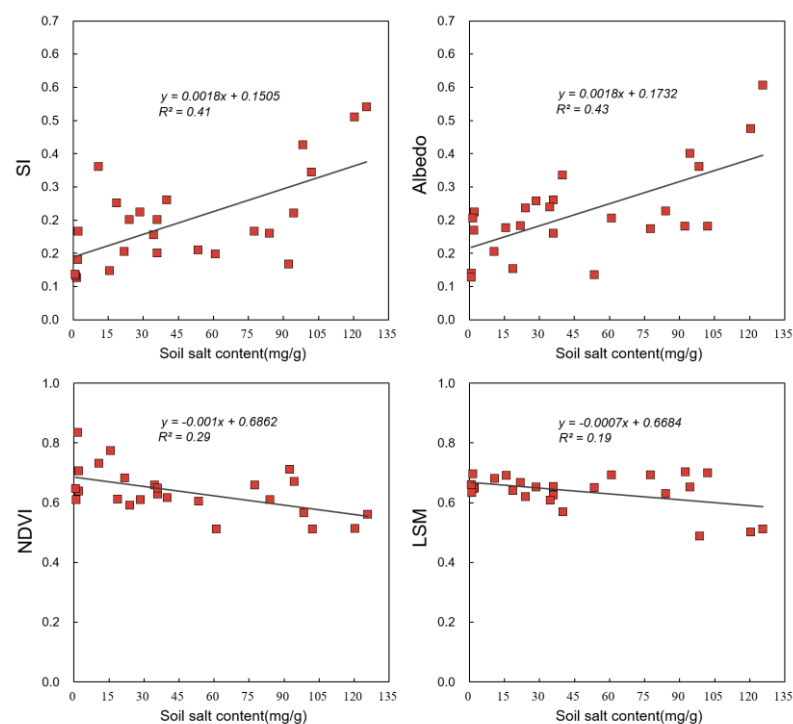

**Figure S2.** Relationship between the four selected indicators (2019) and field-measured soil salt content (2019). SI: salinization index; NDVI: normalized difference vegetation index; LSM: land surface soil moisture index.
